# Supplementary material for: Comparing large-scale computational approaches to epidemic modeling: Agent-based versus structured metapopulation models
Source: Springer Nature journal article supplement (doi:10.1186/1471-2334-10-190), 2010-06-29

A)

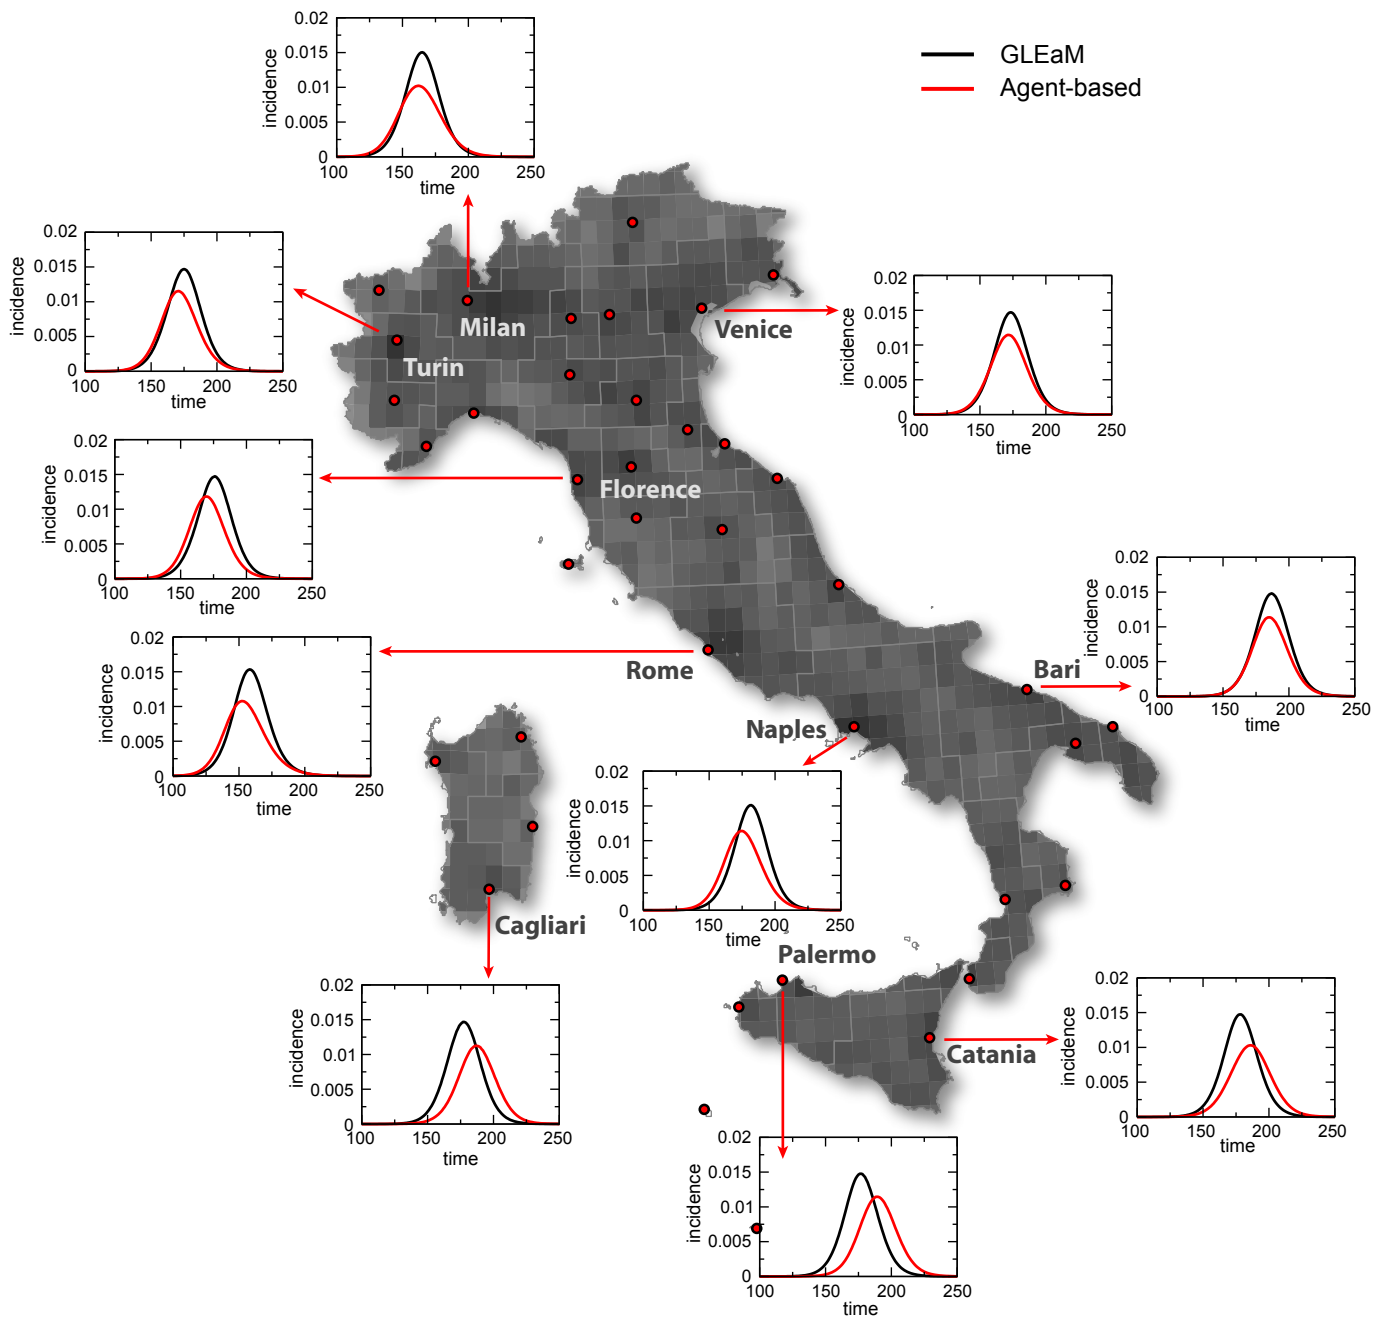

B)

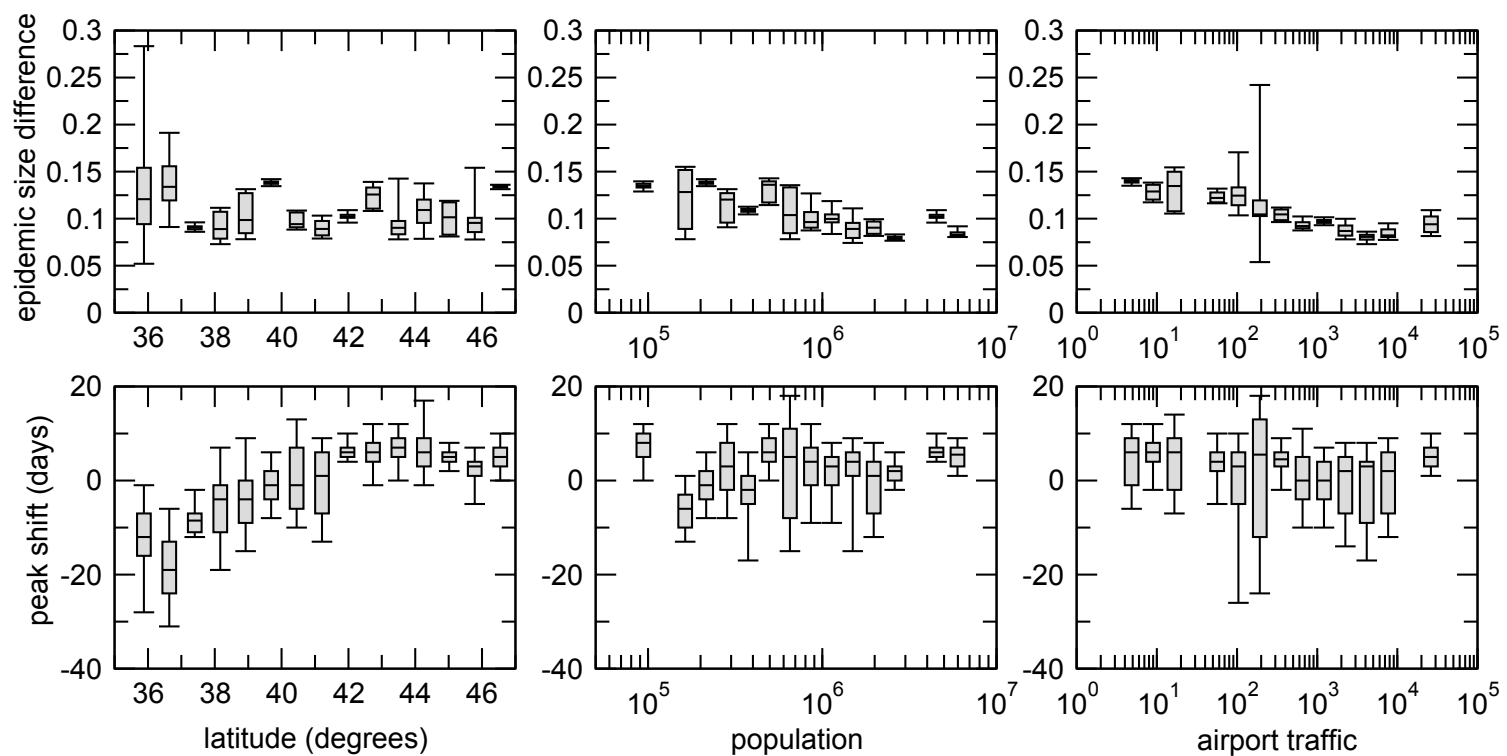

Supplement: 12879_2009_1170_MOESM6_ESM.pdf [file 12879_2009_1170_MOESM6_ESM.pdf]
